# Supplementary material for: How Does the VSG Coat of Bloodstream Form African Trypanosomes Interact with External Proteins?
Source: PubMed Central journal article supplement (PMC4697842; doi:10.1371/journal.ppat.1005259), 2015-12-31
Supplement: ppat.1005259.s001.pdf [file ppat.1005259.s001.pdf]

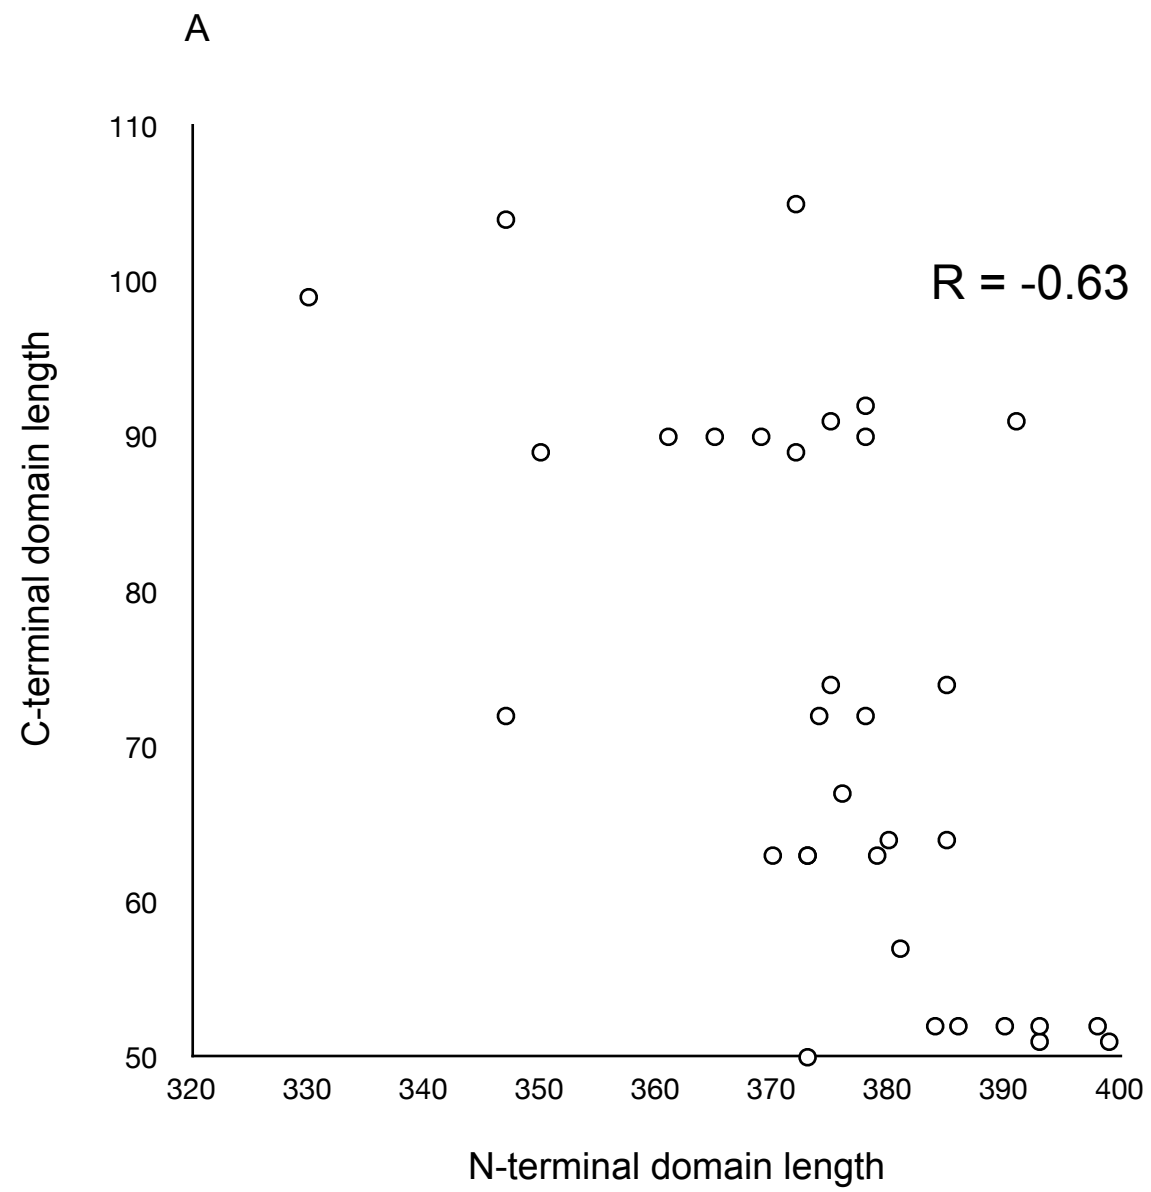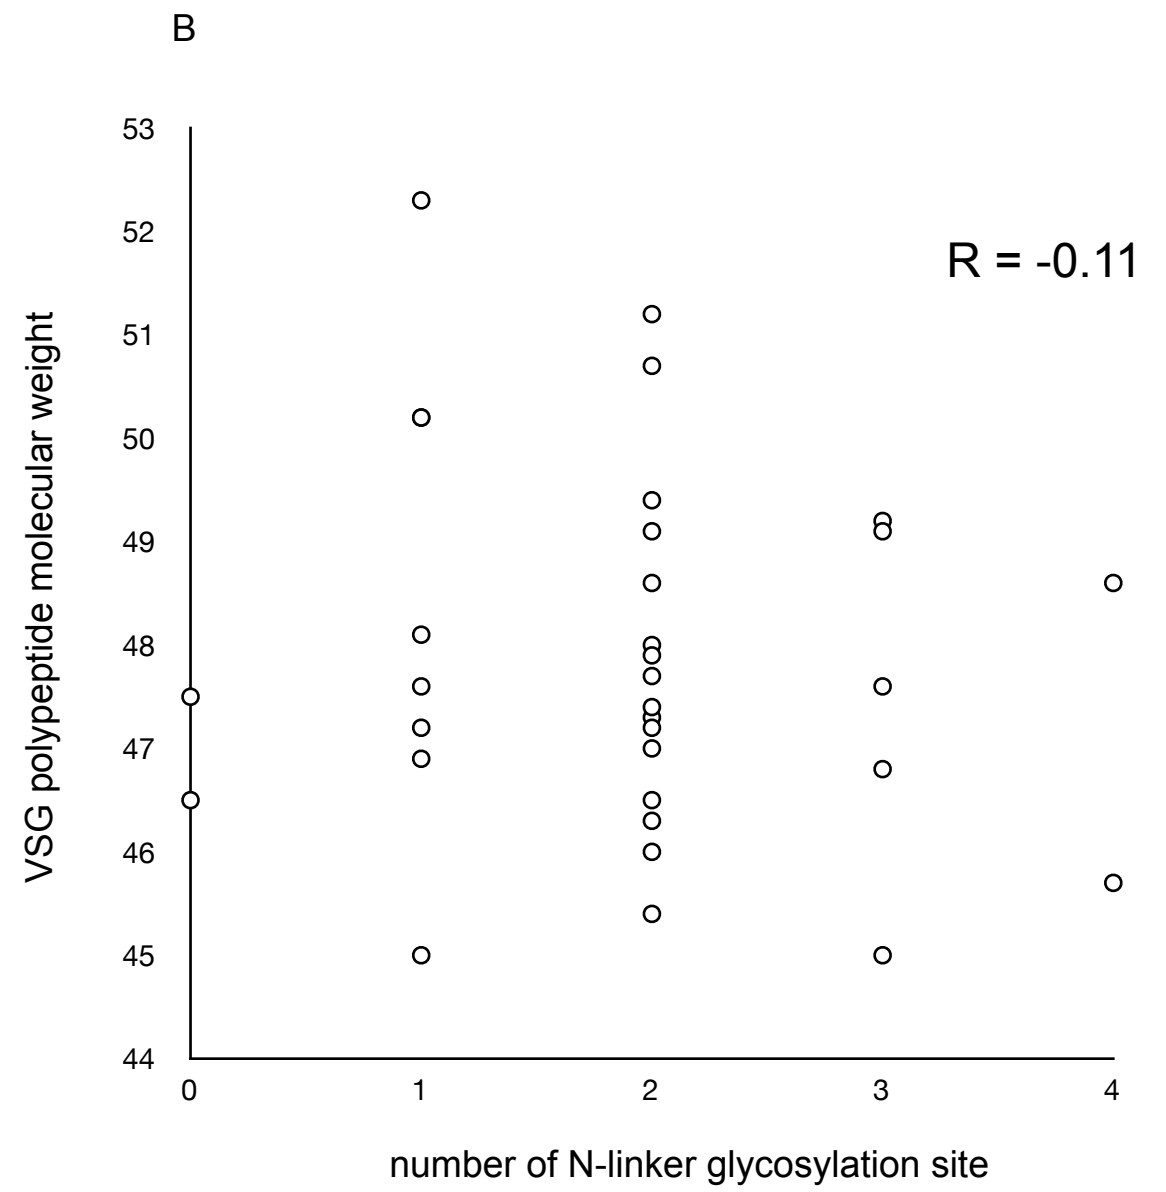

Supplementary Figure 1
